# Supplementary material for: Length and Redundancy of Outpatient Progress Notes Across a Decade at an Academic Medical Center
Source: PubMed Central journal article supplement (PMC8290305; doi:10.1001/jamanetworkopen.2021.15334), 2021-07-19
Supplement: jamanetwopen-e2115334-s001.pdf [file jamanetwopen-e2115334-s001.pdf]

## Supplemental Online Content

Rule A, Bedrick S, Chiang MF, Hribar MR. Length and redundancy of outpatient progress notes across a decade at an academic medical center. *JAMA Netw Open*. 2021;4(7):e2115334. doi:10.1001/jamanetworkopen.2021.15334

**eTable 1.** Sample Sizes for Note Length, Note Redundancy, and Note Text Source Analyses by Specialty and Specialty Type

**eTable 2.** Note Length, Note Redundancy, and Source of Note Text by Specialty and Specialty Type

**eTable 3.** Parameter Estimates for Factors in Mixed-Effect Linear Models of Note Length and Note Redundancy Using Data From 2009-2018 and Only 2017-2018

This supplemental material has been provided by the authors to give readers additional information about their work.

eTable1. Sample Sizes for Note Length, Note Redundancy, and Note Text Source Analyses by Specialty and Specialty Type

| Specialty               |                | Note Length Analysis |         |            | Note Redundancy Analysis |         |            | Note Text Source Analysis |         |            |
|-------------------------|----------------|----------------------|---------|------------|--------------------------|---------|------------|---------------------------|---------|------------|
| Specialty Name          | Specialty Type | # Notes              | # Auth. | # Patients | # Note Pairs             | # Auth. | # Patients | # Notes                   | # Auth. | # Patients |
| Family Practice         | Primary Care   | 706268               | 1192    | 93906      | 272934                   | 396     | 51992      | 191466                    | 552     | 50117      |
| Internal Medicine       | Primary Care   | 292212               | 759     | 31319      | 135131                   | 378     | 20767      | 66258                     | 290     | 16440      |
| Pediatrics              | Primary Care   | 238879               | 793     | 28410      | 59314                    | 318     | 15717      | 53704                     | 320     | 12053      |
| Ophthalmology           | Adult          | 232601               | 349     | 36567      | 97618                    | 242     | 20117      | 54132                     | 169     | 16883      |
| Obstetrics & Gynecology | Primary Care   | 193320               | 689     | 25478      | 59368                    | 278     | 12744      | 40435                     | 239     | 9901       |
| Orthopedics             | Surgical       | 140035               | 317     | 28677      | 55388                    | 93      | 16332      | 31091                     | 132     | 10003      |
| Dermatology             | Adult          | 138428               | 427     | 36324      | 49405                    | 140     | 13642      | 32747                     | 140     | 14803      |
| Hematology & Oncology   | Adult          | 102665               | 401     | 10077      | 53777                    | 157     | 6296       | 22827                     | 158     | 4333       |
| Otolaryngology          | Adult          | 64138                | 278     | 20358      | 26081                    | 115     | 8376       | 14313                     | 95      | 6963       |
| Cardiology              | Adult          | 60460                | 265     | 12875      | 22961                    | 135     | 6490       | 17373                     | 126     | 5906       |
| Endocrinology           | Adult          | 60282                | 382     | 10176      | 29274                    | 98      | 5825       | 12539                     | 122     | 4164       |
| Neurology               | Adult          | 42504                | 238     | 10829      | 21732                    | 168     | 5273       | 9561                      | 115     | 3995       |
| Pain Management         | Adult          | 41440                | 157     | 8845       | 14174                    | 47      | 2475       | 12765                     | 59      | 2510       |
| Surgery                 | Surgical       | 33046                | 566     | 9203       | 12307                    | 152     | 4251       | 6895                      | 187     | 2817       |
| Urology                 | Surgical       | 28674                | 151     | 8577       | 11991                    | 49      | 3807       | 6635                      | 30      | 2879       |
| Rheumatology            | Adult          | 26087                | 232     | 5759       | 15633                    | 57      | 3076       | 6323                      | 74      | 2258       |
| Plastic Surgery         | Surgical       | 23854                | 158     | 6123       | 7174                     | 56      | 2286       | 6253                      | 45      | 1936       |
| Pediatric Hem. & Onc.   | Pediatric      | 23663                | 169     | 1427       | 9559                     | 63      | 824        | 5435                      | 58      | 604        |
| Neurological Surgery    | Surgical       | 17482                | 139     | 5350       | 4899                     | 77      | 2010       | 3987                      | 64      | 1872       |
| Gastroenterology        | Adult          | 16320                | 99      | 7365       | 5967                     | 56      | 2349       | 4005                      | 50      | 2566       |
| Vascular Surgery        | Surgical       | 15613                | 318     | 3642       | 1867                     | 81      | 996        | 3116                      | 105     | 1322       |
| Radiation Oncology      | Adult          | 15393                | 72      | 2847       | 6434                     | 49      | 1608       | 3756                      | 35      | 913        |
| Surgical Oncology       | Surgical       | 14288                | 307     | 3411       | 6475                     | 65      | 1811       | 3105                      | 76      | 1301       |
| Pulmonary Disease       | Adult          | 14054                | 183     | 4405       | 6422                     | 59      | 1907       | 2133                      | 67      | 1069       |
| Nephrology              | Adult          | 13361                | 113     | 2941       | 8042                     | 63      | 1661       | 3098                      | 48      | 1292       |
| Hepatobiliary Surgery   | Surgical       | 11879                | 260     | 1743       | 4288                     | 59      | 920        | 3132                      | 75      | 931        |
| Hepatology              | Adult          | 11178                | 86      | 3295       | 6601                     | 16      | 1727       | 1972                      | 35      | 1174       |
| Sleep Medicine          | Adult          | 11032                | 45      | 5461       | 1128                     | 14      | 606        | 58                        | 10      | 53         |
| Pediatric Gastro.       | Pediatric      | 10130                | 115     | 3100       | 5960                     | 19      | 1590       | 2582                      | 41      | 1098       |
| Pediatric Cardiology    | Pediatric      | 10021                | 47      | 3235       | 4852                     | 28      | 1188       | 2233                      | 26      | 1228       |
| Infectious Disease      | Adult          | 9222                 | 114     | 2992       | 4566                     | 47      | 1418       | 1752                      | 56      | 885        |
| Pediatric Orthopedics   | Surgical       | 8454                 | 135     | 3772       | 1830                     | 35      | 1082       | 2029                      | 53      | 1014       |
| Pediatric Nephrology    | Pediatric      | 8102                 | 78      | 1086       | 4806                     | 10      | 756        | 2247                      | 25      | 528        |
| Pediatric Neurology     | Pediatric      | 8026                 | 209     | 2274       | 3533                     | 29      | 1021       | 1782                      | 35      | 851        |

|                          |              |         |      |        |         |      |        |        |      |        |
|--------------------------|--------------|---------|------|--------|---------|------|--------|--------|------|--------|
| Pediatric Pulmonology    | Pediatric    | 7839    | 93   | 1415   | 3045    | 8    | 805    | 1767   | 25   | 611    |
| Facial Plastic Surgery   | Surgical     | 7162    | 40   | 1899   | 3576    | 22   | 1011   | 1719   | 9    | 690    |
| Pediatric Surgery        | Surgical     | 7017    | 132  | 2522   | 1882    | 29   | 777    | 1454   | 24   | 733    |
| Pediatric Urology        | Surgical     | 6295    | 53   | 2307   | 2363    | 22   | 947    | 1681   | 26   | 876    |
| Pediatric Endocrinology  | Pediatric    | 6112    | 194  | 1878   | 2783    | 23   | 824    | 1468   | 67   | 747    |
| Heart Transplant         | Surgical     | 5918    | 63   | 816    | 2130    | 21   | 523    | 1156   | 10   | 231    |
| Pediatric Neuro. Surgery | Surgical     | 5523    | 44   | 1504   | 779     | 33   | 450    | 1471   | 23   | 571    |
| Oral & Max. Surgery      | Surgical     | 4665    | 53   | 2063   | 1355    | 35   | 561    | 11     | 5    | 11     |
| Allergy & Immunology     | Adult        | 3825    | 147  | 2224   | 1310    | 5    | 481    | 723    | 24   | 566    |
| Cardiac Surgery          | Surgical     | 2954    | 48   | 1500   | 547     | 18   | 381    | 728    | 18   | 385    |
| Thoracic Surgery         | Surgical     | 2946    | 111  | 1016   | 311     | 21   | 211    | 695    | 31   | 305    |
| Pediatric Inf. Dis.      | Pediatric    | 1433    | 58   | 441    | 873     | 6    | 178    | 305    | 15   | 120    |
|                          | Primary Care | 1430679 | 2945 | 150880 | 526747  | 1333 | 91992  | 351863 | 1319 | 79915  |
|                          | Adult        | 891664  | 2863 | 95347  | 383116  | 1483 | 54401  | 206712 | 1237 | 45546  |
|                          | Surgical     | 306516  | 1739 | 54909  | 108386  | 690  | 29418  | 68261  | 681  | 21038  |
|                          | Pediatric    | 75941   | 745  | 13231  | 34196   | 210  | 6298   | 18081  | 294  | 5110   |
|                          | All          | 2704800 | 6228 | 182487 | 1052445 | 3460 | 123734 | 644917 | 3049 | 100950 |

Auth. = Authors; Hem. & Onc. = Hematology & Oncology; Gastro. = Gastroenterology; Neuro. = Neurological; Max = Maxillofacial; Inf. Dis. = Infectious Diseases

eTable 2. Note Length, Note Redundancy, and Source of Note Text by Specialty and Specialty Type

| Specialty                           | Note Length         |                     |                      | Note Redundancy |                 |                            | Note Text Source    |                      |                        |                            |
|-------------------------------------|---------------------|---------------------|----------------------|-----------------|-----------------|----------------------------|---------------------|----------------------|------------------------|----------------------------|
|                                     | 2009 Median (Words) | 2018 Median (Words) | % Increase 2009-2018 | 2009 Median (%) | 2018 Median (%) | %-point Increase 2009-2018 | 2018 Typed (%Chars) | 2018 Copied (%Chars) | 2018 Template (%Chars) | 2018 Non-Provider (%Chars) |
| Allergy & Immunology                | 272                 | 348                 | 28.2                 | 68.0            | 80.8            | 12.8                       | 25.0                | 4.0                  | 70.9                   | 1.8                        |
| Cardiac Surgery                     | 670                 | 833                 | 24.3                 | 49.9            | 54.4            | 4.5                        | 23.9                | 18.7                 | 57.4                   | 24.5                       |
| Cardiology                          | 659                 | 1211                | 83.7                 | 61.9            | 72.8            | 10.9                       | 22.7                | 37.2                 | 40.1                   | 17.3                       |
| Dermatology                         | 270                 | 548                 | 103.0                | 54.5            | 66.2            | 11.7                       | 29.5                | 22.5                 | 48.0                   | 56.1                       |
| Endocrinology                       | 619                 | 900                 | 45.4                 | 53.0            | 65.5            | 12.5                       | 26.4                | 24.1                 | 49.6                   | 4.4                        |
| Facial Plastic Surgery <sup>b</sup> | 181                 | 197                 | 8.8                  | 42.7            | 44.8            | 2.1                        | 41.1                | 12.5                 | 46.4                   | 59.1                       |
| Family Practice                     | 345                 | 506                 | 46.7                 | 39.2            | 47.8            | 8.6                        | 33.2                | 5.8                  | 61.0                   | 7.7                        |
| Gastroenterology                    | 584                 | 1289                | 120.6                | 40.6            | 59.4            | 18.8                       | 29.0                | 22.3                 | 48.8                   | 23.2                       |
| Heart Transplant                    | 565                 | 1604                | 183.9                | 64.6            | 74.9            | 10.4                       | 18.0                | 53.6                 | 28.4                   | 3.6                        |
| Hematology & Oncology               | 344                 | 1175                | 241.6                | 76.3            | 77.7            | 1.4                        | 16.5                | 46.5                 | 37.0                   | 6.8                        |
| Hepatobiliary Surgery               | 787                 | 987                 | 25.4                 | 65.2            | 77.9            | 12.7                       | 20.3                | 17.8                 | 61.8                   | 3.4                        |
| Hepatology                          | 705                 | 1008                | 43.0                 | 67.8            | 70.0            | 2.2                        | 22.4                | 26.0                 | 51.6                   | 0.0                        |
| Infectious Disease                  | 1063                | 1080                | 1.6                  | 61.0            | 54.6            | -6.4                       | 34.6                | 18.2                 | 47.2                   | 0.1                        |
| Internal Medicine                   | 695                 | 964                 | 38.7                 | 49.8            | 54.2            | 4.4                        | 33.9                | 6.1                  | 59.9                   | 11.8                       |
| Nephrology                          | 674                 | 1013                | 50.2                 | 56.1            | 67.4            | 11.3                       | 23.7                | 19.6                 | 56.7                   | 15.3                       |
| Neurological Surgery                | 284                 | 830                 | 192.1                | 26.7            | 61.2            | 34.5                       | 32.6                | 22.2                 | 45.2                   | 14.6                       |
| Neurology                           | 743                 | 1275                | 71.6                 | 50.5            | 70.4            | 19.8                       | 26.4                | 35.4                 | 38.2                   | 9.8                        |
| Obstetrics & Gynecology             | 251                 | 676                 | 169.9                | 44.7            | 54.7            | 9.9                        | 32.8                | 18.0                 | 49.2                   | 27.0                       |
| Ophthalmology                       | 344                 | 583                 | 69.5                 | 54.6            | 74.7            | 20.1                       | 11.4                | 13.7                 | 74.9                   | 56.1                       |
| Oral & Max. Surgery <sup>a</sup>    | 196                 | 264                 | 34.7                 | 18.2            | 53.3            | 35.1                       | 30.9                | 7.8                  | 61.3                   | 16.0                       |
| Orthopedics                         | 292                 | 393                 | 34.8                 | 33.8            | 42.6            | 8.8                        | 30.4                | 19.1                 | 50.5                   | 21.7                       |
| Otolaryngology                      | 335                 | 694                 | 107.2                | 45.7            | 62.2            | 16.5                       | 24.7                | 16.0                 | 59.3                   | 22.0                       |
| Pain Management                     | 345                 | 467                 | 35.4                 | 58.4            | 64.9            | 6.5                        | 33.3                | 26.8                 | 39.9                   | 16.0                       |
| Pediatric Cardiology                | 540                 | 835                 | 54.6                 | 58.6            | 70.0            | 11.4                       | 24.0                | 38.7                 | 37.2                   | 9.2                        |
| Pediatric Endocrinology             | 711                 | 973                 | 36.8                 | 58.1            | 68.3            | 10.1                       | 27.8                | 42.9                 | 29.3                   | 7.8                        |
| Pediatric Gastro.                   | 680                 | 1044                | 53.5                 | 49.4            | 64.1            | 14.7                       | 18.8                | 18.4                 | 62.8                   | 9.4                        |

|                                  |      |      |       |      |      |      |      |      |      |      |
|----------------------------------|------|------|-------|------|------|------|------|------|------|------|
| Pediatric Hem. - Onc.            | 706  | 1180 | 67.1  | 75.5 | 78.3 | 2.8  | 15.3 | 58.7 | 26.0 | 3.9  |
| Pediatric Inf. Dis. <sup>b</sup> | 548  | 1111 | 102.7 | 62.5 | 62.5 | 0.0  | 36.2 | 19.1 | 44.7 | 1.2  |
| Pediatric Nephrology             | 773  | 1315 | 70.1  | 45.3 | 59.2 | 13.9 | 23.1 | 19.2 | 57.8 | 7.8  |
| Pediatric Neuro. Surgery         | 299  | 460  | 54.1  | 26.1 | 38.1 | 12.0 | 36.0 | 16.1 | 47.8 | 7.1  |
| Pediatric Neurology              | 795  | 1199 | 50.8  | 41.5 | 63.6 | 22.1 | 24.2 | 35.4 | 40.4 | 11.2 |
| Pediatric Orthopedics            | 372  | 357  | -4.2  | 29.2 | 58.4 | 29.2 | 41.1 | 16.4 | 42.5 | 42.8 |
| Pediatric Pulmonology            | 688  | 1109 | 61.3  | 65.3 | 56.8 | -8.5 | 21.5 | 15.9 | 62.6 | 6.5  |
| Pediatric Surgery                | 249  | 692  | 178.5 | 27.2 | 41.6 | 14.4 | 29.9 | 14.9 | 55.2 | 54.5 |
| Pediatric Urology <sup>b</sup>   | 481  | 684  | 42.2  | 31.0 | 46.1 | 15.1 | 29.4 | 14.2 | 56.4 | 14.1 |
| Pediatrics                       | 348  | 590  | 69.4  | 37.5 | 46.8 | 9.3  | 37.0 | 8.4  | 54.7 | 15.6 |
| Plastic Surgery                  | 167  | 280  | 67.7  | 25.2 | 65.1 | 39.9 | 37.3 | 18.9 | 43.9 | 19.7 |
| Pulmonary Disease                | 1029 | 1365 | 32.7  | 34.1 | 66.0 | 31.9 | 28.8 | 14.5 | 56.7 | 3.1  |
| Radiation Oncology               | 381  | 450  | 18.1  | 58.0 | 58.9 | 0.9  | 17.1 | 19.5 | 63.4 | 17.2 |
| Rheumatology                     | 775  | 1233 | 59.1  | 59.1 | 70.2 | 11.1 | 23.3 | 27.3 | 49.4 | 5.1  |
| Sleep Medicine                   | 446  | 1252 | 180.7 | 52.6 | 65.0 | 12.4 | 28.3 | 14.3 | 57.4 | 5.9  |
| Surgery                          | 280  | 710  | 153.4 | 38.7 | 52.2 | 13.5 | 25.9 | 14.9 | 59.1 | 33.2 |
| Surgical Oncology                | 724  | 1166 | 61.0  | 41.8 | 66.7 | 24.9 | 14.9 | 27.9 | 57.2 | 11.4 |
| Thoracic Surgery                 | 764  | 765  | 0.1   | 47.1 | 57.0 | 9.8  | 27.6 | 14.7 | 57.7 | 2.3  |
| Urology                          | 464  | 566  | 22.1  | 54.4 | 66.4 | 11.9 | 21.6 | 27.2 | 51.1 | 3.9  |
| Vascular Surgery                 | 328  | 573  | 74.7  | 38.2 | 42.2 | 4.0  | 37.9 | 19.4 | 42.7 | 8.0  |
| Adult                            | 421  | 775  | 84.1  | 57.5 | 70.3 | 12.8 | 21.7 | 24.6 | 53.7 | 30.2 |
| Pediatric                        | 642  | 1013 | 57.8  | 60.0 | 67.2 | 7.2  | 23.1 | 36.3 | 40.6 | 11.2 |
| Primary                          | 394  | 589  | 49.5  | 43.5 | 50.1 | 6.5  | 33.8 | 7.5  | 58.7 | 11.5 |
| Surgical                         | 330  | 555  | 68.2  | 35.8 | 52.5 | 16.6 | 29.8 | 19.1 | 51.1 | 20.6 |
| All                              | 401  | 642  | 60.1  | 47.9 | 58.8 | 10.9 | 29.4 | 14.7 | 55.9 | 18.2 |

<sup>a</sup>2017 data used in place of 2018 data

<sup>b</sup>2010 data used in place of 2009 data

Hem. & Onc. = Hematology & Oncology; Gastro. = Gastroenterology; Neuro. = Neurological; Max = Maxillofacial; Inf. Dis. = Infectious Diseases

eTable 3. Parameter Estimates for Factors in Mixed-Effect Linear Models of Note Length and Note Redundancy Using Data From 2009-2018 and Only 2017-2018

| Factor                                         | Note Length (% increase) |                     | Note Redundancy (%-point increase) |                        |
|------------------------------------------------|--------------------------|---------------------|------------------------------------|------------------------|
|                                                | 2009 - 2018 Data         | 2017-2018 Data      | 2009 - 2018 Data                   | 2017-2018 Data         |
|                                                | Est. (95% CI)            | Est. (95% CI)       | Est. (95% CI)                      | Est. (95% CI)          |
| Encounter Year (per year)                      | 2.4 (1.4 to 3.5)         | 0.5 (-1.0 to 2.0)   | 0.7 (0.5 to 1.0)                   | 0.3 (-0.03 to 0.7)     |
| Author Start Year (per year)                   | 1.8 (1.3 to 2.4)         | 2.0 (1.3 to 2.6)    | 0.2 (0.03 to 0.3)                  | 0.4 (0.3 to 0.5)       |
| Author is Trainee                              | 26.3 (25.8 to 26.7)      | 5.0 (4.1 to 5.9)    | -7.0 (-6.7 to -7.3)                | -4.0 (-3.5 to -4.6)    |
| Billing: Level 4 vs. Level 3                   | 27.9 (27.7 to 28.2)      | 26.1 (25.7 to 26.5) | -1.9 (-1.8 to -2.0)                | -2.6 (-2.4 to -2.8)    |
| New Visit vs. Return Visit                     | 32.2 (31.9 to 32.4)      | 29.3 (28.9 to 29.8) | -16.7 (-16.2 to -17.1)             | -15.6 (-14.8 to -16.2) |
| Number of Prior Visits (per visit)             | 0.1 (0.1 to 0.1)         | 0.1 (0.1 to 0.1)    | 0.04 (0.04 to 0.04)                | 0.02 (0.02 to 0.02)    |
| % Note Text by non-Auth. (per 1%) <sup>a</sup> | -                        | 0.5 (0.5 to 0.5)    | -                                  | -0.03 (-0.03 to -0.04) |
| % Note Text Copied (per 1%) <sup>a</sup>       | -                        | 1.5 (1.5 to 1.5)    | -                                  | 0.6 (0.6 to 0.6)       |
| % Note Text Templated (per 1%) <sup>a</sup>    | -                        | 1.6 (1.6 to 1.6)    | -                                  | 0.4 (0.4 to 0.4)       |

<sup>a</sup> Note source data were only available for the years of 2017-2018, so not included as factors in the models using 2009-2018 data.  
Est. = Estimate; non-Auth. = non primary author
